# Supplementary material for: The integrative application of AMF and CaO nanoparticles promotes AMF symbiosis and modulates redox and photosynthetic pathways to alleviate NaCl-stress effects in rice
Source: Royal Society of Chemistry journal article supplement (doi:10.1039/d5en00583c), 2025-12-02

## Supplementary Information

### Supplementary Tables

**Table S1** Standardisation of NaCl stress imparting concentration in the rice var. KAU Akshaya using Shoot length, Root length, Fresh weight (FW) and Dry Weight (DW). The table presents the mean  $\pm$  S.E. in var. KAU Akshaya for nine replicates (n=9). Different lowercase superscript letters denote statistically significant differences among treatments according to Tukey's HSD post hoc test following one-way ANOVA ( $P < 0.05$ ), where treatments sharing the same letter are not significantly significant.

| Rive variety | Concentration (mM) | Shoot Length (cm)          | Root Length (cm)             | FW (g)                      | DW (g)                        |
|--------------|--------------------|----------------------------|------------------------------|-----------------------------|-------------------------------|
| KAU Akshaya  | Control (0)        | 9.4 $\pm$ 0.3 <sup>a</sup> | 13.1 $\pm$ 0.34 <sup>a</sup> | 7.1 $\pm$ 0.8 <sup>b</sup>  | 0.088 $\pm$ 0.43 <sup>a</sup> |
|              | 100                | 7.1 $\pm$ 0.7 <sup>b</sup> | 11.7 $\pm$ 0.3 <sup>b</sup>  | 6.1 $\pm$ 0.9 <sup>a</sup>  | 0.061 $\pm$ 0.3 <sup>b</sup>  |
|              | 125                | 6.6 $\pm$ 0.7 <sup>c</sup> | 10.3 $\pm$ 0.5 <sup>c</sup>  | 5.7 $\pm$ 0.6 <sup>ab</sup> | 0.054 $\pm$ 0.1 <sup>b</sup>  |
|              | 150                | 5.6 $\pm$ 0.3 <sup>d</sup> | 9.8 $\pm$ 0.7 <sup>d</sup>   | 4.8 $\pm$ 0.7 <sup>c</sup>  | 0.051 $\pm$ 0.3 <sup>b</sup>  |
|              | 175                | 4.9 $\pm$ 0.2 <sup>e</sup> | 6.5 $\pm$ 0.9 <sup>e</sup>   | 3.5 $\pm$ 0.5 <sup>d</sup>  | 0.041 $\pm$ 0.2 <sup>c</sup>  |
|              | 200                | 3.8 $\pm$ 0.1 <sup>f</sup> | 3.7 $\pm$ 0.3 <sup>f</sup>   | 2.7 $\pm$ 0.1 <sup>e</sup>  | 0.028 $\pm$ 0.1 <sup>d</sup>  |

**Table S2** Impact of NaCl stress, AMF, and CaO NPs on GSH, GSSG, total glutathione, reduced ascorbate, dehydroascorbate, and the ascorbate/dehydroascorbate ratio in rice roots. Data represent mean  $\pm$  S.E. from nine biological replicates (n = 9). Different lowercase superscript letters denote statistically significant differences among treatments according to Tukey's HSD post hoc test following one-way ANOVA ( $P < 0.05$ ), where treatments sharing the same letter are not significantly significant.

| <b>Treatments</b> | <b>GSH content (mg g<sup>-1</sup> FW)</b> | <b>GSSG (mg g<sup>-1</sup> FW)</b> | <b>Total Glutathione (mg g<sup>-1</sup> FW)</b> | <b>Reduced ascorbate content (mg g<sup>-1</sup> FW)</b> | <b>Dehydroascorbate (mg g<sup>-1</sup> FW)</b> | <b>Ascorbate/Dehydroascorbate ratio</b> |
|-------------------|-------------------------------------------|------------------------------------|-------------------------------------------------|---------------------------------------------------------|------------------------------------------------|-----------------------------------------|
| C                 | 0.81 $\pm$ 0.01 <sup>h</sup>              | 0.21 $\pm$ 0.05 <sup>f</sup>       | 1.23 $\pm$ 0.05 <sup>e</sup>                    | 2.17 $\pm$ 0.03 <sup>e</sup>                            | 0.41 $\pm$ 0.04 <sup>ef</sup>                  | 5.29 $\pm$ 0.15 <sup>c</sup>            |
| CM                | 1.04 $\pm$ 0.06 <sup>g</sup>              | 0.23 $\pm$ 0.04 <sup>e</sup>       | 1.5 $\pm$ 0.03 <sup>f</sup>                     | 2.24 $\pm$ 0.11 <sup>f</sup>                            | 0.39 $\pm$ 0.06 <sup>e</sup>                   | 5.74 $\pm$ 0.28 <sup>c</sup>            |
| CN                | 1.09 $\pm$ 0.09 <sup>f</sup>              | 0.24 $\pm$ 0.09 <sup>ef</sup>      | 1.57 $\pm$ 0.03 <sup>f</sup>                    | 2.25 $\pm$ 0.19 <sup>de</sup>                           | 0.38 $\pm$ 0.07 <sup>d</sup>                   | 5.92 $\pm$ 0.92 <sup>b</sup>            |
| CMN               | 1.13 $\pm$ 0.03 <sup>e</sup>              | 0.26 $\pm$ 0.09 <sup>d</sup>       | 1.65 $\pm$ 0.28 <sup>g</sup>                    | 2.28 $\pm$ 0.12 <sup>d</sup>                            | 0.35 $\pm$ 0.07 <sup>f</sup>                   | 6.51 $\pm$ 0.74 <sup>a</sup>            |
| S                 | 0.89 $\pm$ 0.09 <sup>d</sup>              | 0.79 $\pm$ 0.01 <sup>c</sup>       | 2.83 $\pm$ 0.19 <sup>a</sup>                    | 3.11 $\pm$ 0.07 <sup>c</sup>                            | 1.75 $\pm$ 0.03 <sup>a</sup>                   | 1.77 $\pm$ 0.33 <sup>f</sup>            |
| SM                | 1.17 $\pm$ 0.07 <sup>c</sup>              | 0.71 $\pm$ 0.03 <sup>b</sup>       | 2.59 $\pm$ 0.16 <sup>c</sup>                    | 3.41 $\pm$ 0.09 <sup>b</sup>                            | 0.96 $\pm$ 0.09 <sup>b</sup>                   | 3.55 $\pm$ 0.19 <sup>de</sup>           |
| SN                | 1.21 $\pm$ 0.08 <sup>b</sup>              | 0.69 $\pm$ 0.01 <sup>b</sup>       | 2.6 $\pm$ 0.11 <sup>d</sup>                     | 3.54 $\pm$ 0.13 <sup>ab</sup>                           | 0.91 $\pm$ 0.09 <sup>bc</sup>                  | 3.89 $\pm$ 0.23 <sup>e</sup>            |
| SMN               | 1.37 $\pm$ 0.08 <sup>a</sup>              | 0.67 $\pm$ 0.09 <sup>a</sup>       | 2.71 $\pm$ 0.06 <sup>b</sup>                    | 3.71 $\pm$ 0.11 <sup>a</sup>                            | 0.82 $\pm$ 0.06 <sup>c</sup>                   | 4.52 $\pm$ 0.45 <sup>d</sup>            |

**Table S3** Impact of NaCl stress, AMF and CaO NPs on the accumulation of Na<sup>+</sup> and Ca<sup>2+</sup> in leaf and root Data represent mean  $\pm$  S.E. from nine biological replicates (n = 9). Different lowercase superscript letters denote statistically significant differences among treatments according to Tukey's HSD post hoc test following one-way ANOVA (P < 0.05), where treatments sharing the same letter are not significantly significant.

| Treatments | Na <sup>+</sup> (mg kg <sup>-1</sup> DW) |                                  | Ca <sup>2+</sup> (mg kg <sup>-1</sup> DW) |                                |
|------------|------------------------------------------|----------------------------------|-------------------------------------------|--------------------------------|
|            | Leaf                                     | Root                             | Leaf                                      | Root                           |
| C          | 99.07 $\pm$ 0.17 <sup>e</sup>            | 217.17 $\pm$ 0.53 <sup>d</sup>   | 156.63 $\pm$ 0.01 <sup>c</sup>            | 52.04 $\pm$ 0.70 <sup>d</sup>  |
| CM         | 97.22 $\pm$ 0.37 <sup>ef</sup>           | 201.72 $\pm$ 0.37 <sup>e</sup>   | 171.77 $\pm$ 0.12 <sup>ab</sup>           | 59.77 $\pm$ 0.43 <sup>bc</sup> |
| CN         | 91.60 $\pm$ 0.29 <sup>f</sup>            | 164.79 $\pm$ 0.24 <sup>de</sup>  | 169.65 $\pm$ 0.31 <sup>b</sup>            | 59.08 $\pm$ 0.34 <sup>c</sup>  |
| CMN        | 83.14 $\pm$ 0.29 <sup>g</sup>            | 159.74 $\pm$ 0.25 <sup>f</sup>   | 177.16 $\pm$ 0.45 <sup>a</sup>            | 63.59 $\pm$ 0.17 <sup>a</sup>  |
| S          | 699.28 $\pm$ 0.13 <sup>a</sup>           | 1749.18 $\pm$ 0.63 <sup>a</sup>  | 99.41 $\pm$ 0.08 <sup>f</sup>             | 41.37 $\pm$ 0.38 <sup>g</sup>  |
| SM         | 431.16 $\pm$ 0.29 <sup>b</sup>           | 1529.74 $\pm$ 0.77 <sup>ab</sup> | 126.18 $\pm$ 0.09 <sup>e</sup>            | 44.95 $\pm$ 0.61 <sup>f</sup>  |
| SN         | 439.74 $\pm$ 0.29 <sup>c</sup>           | 1317.76 $\pm$ 0.52 <sup>b</sup>  | 129.69 $\pm$ 0.09 <sup>de</sup>           | 43.74 $\pm$ 0.61 <sup>f</sup>  |
| SMN        | 291.18 $\pm$ 0.31 <sup>d</sup>           | 1084.19 $\pm$ 0.44 <sup>bc</sup> | 134.42 $\pm$ 0.22 <sup>d</sup>            | 49.68 $\pm$ 0.55 <sup>e</sup>  |

## Supplementary Figures

**Fig. S1** Standardisation of Calcium Oxide Nanoparticle (CaO NP) priming concentration for the selection of most effective priming dosage in the rice var. KAU Akshaya using total chlorophyll content (in mg/g FW). Bars represent the mean values from nine biological replicates ( $n = 9$ ). Error bars indicate the standard error. Different lowercase letters above error bars denote statistically significant differences among treatments according to Tukey's HSD post hoc test following one-way ANOVA ( $P < 0.05$ ), where treatments sharing the same letter are not significantly significant.

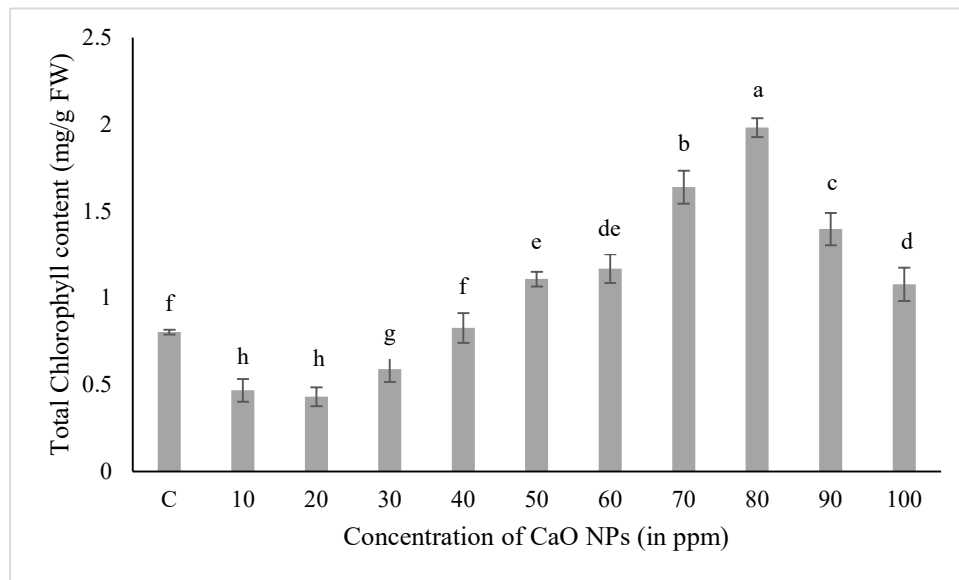

**Fig. S2A** Characterization of CaO NPs. (A) FESEM (scale bar = 200 nm)

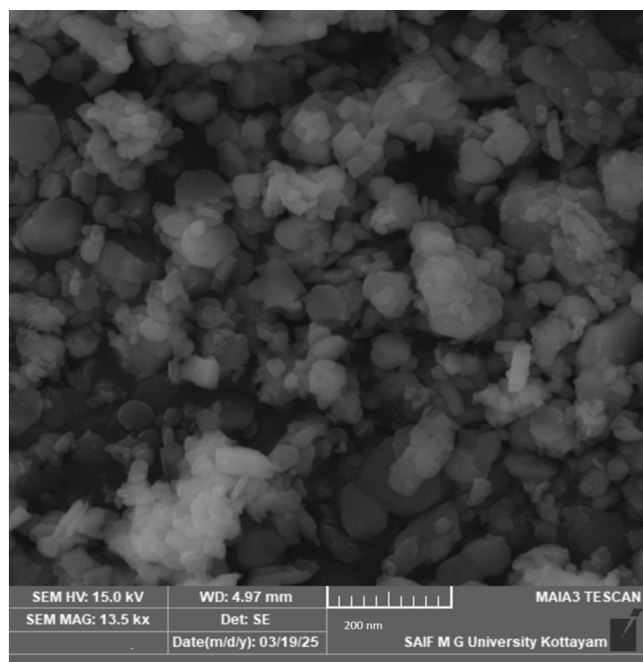

**Fig. S2B** UV-Vis Spectrum of CaO NPs

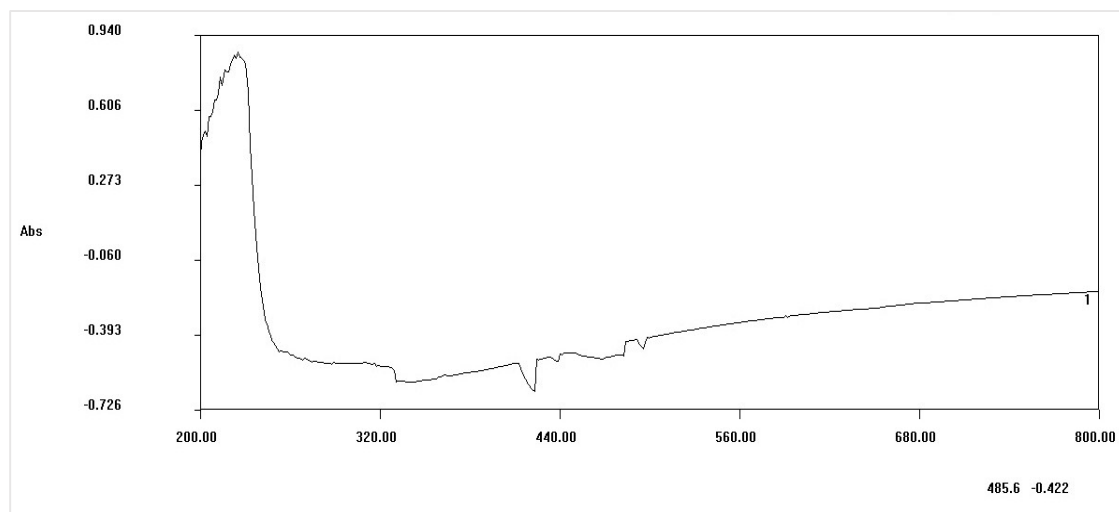

**Fig S2C** EDAX spectrum of CaO NPs

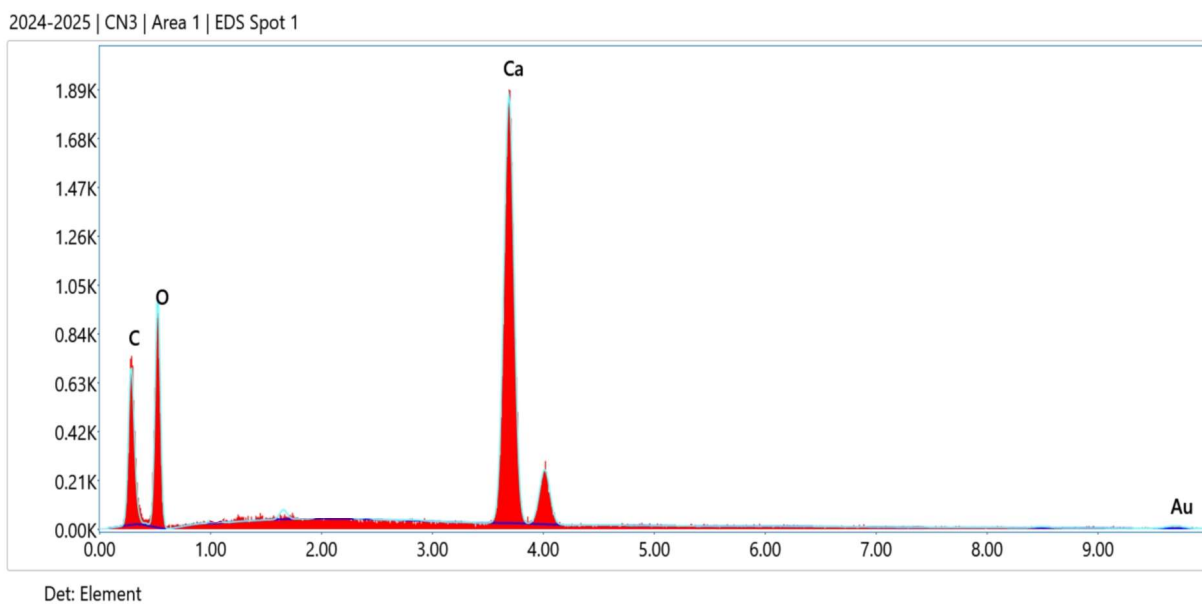

**Fig. S2D** XRD spectrum of CaO NPs

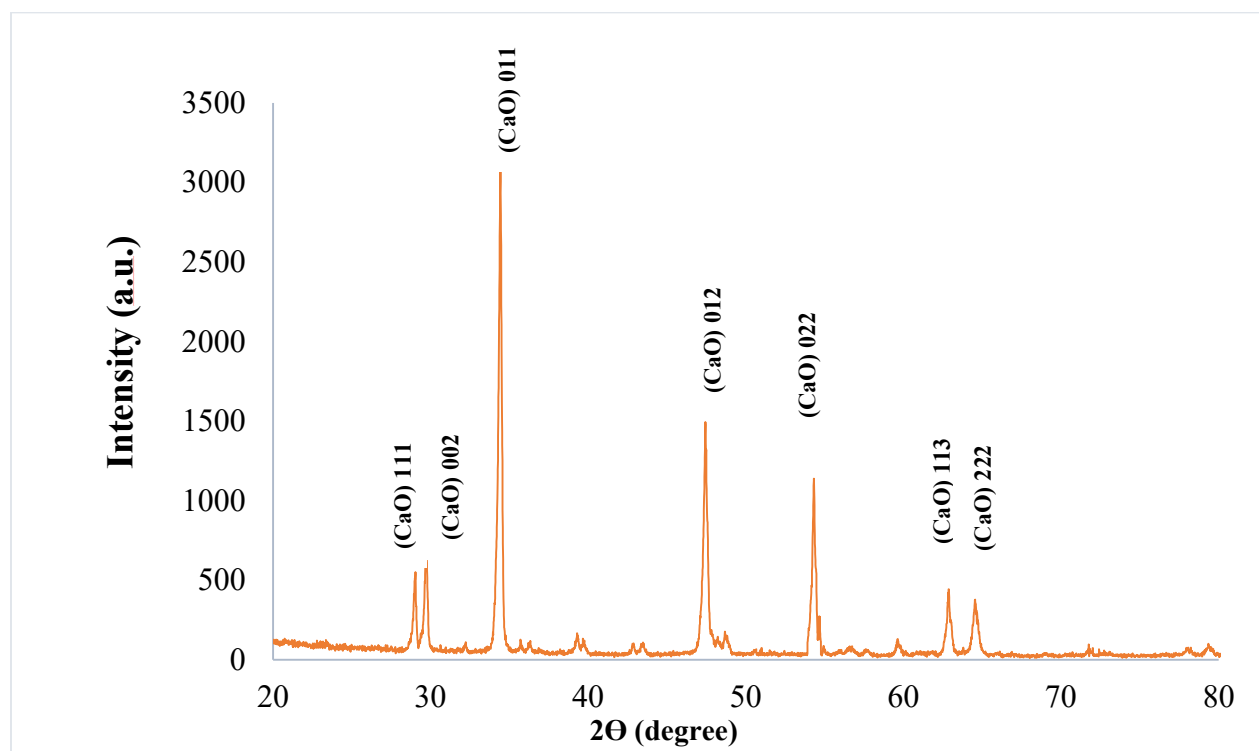

**Fig. S2E** DLS analysis of CaO NPs

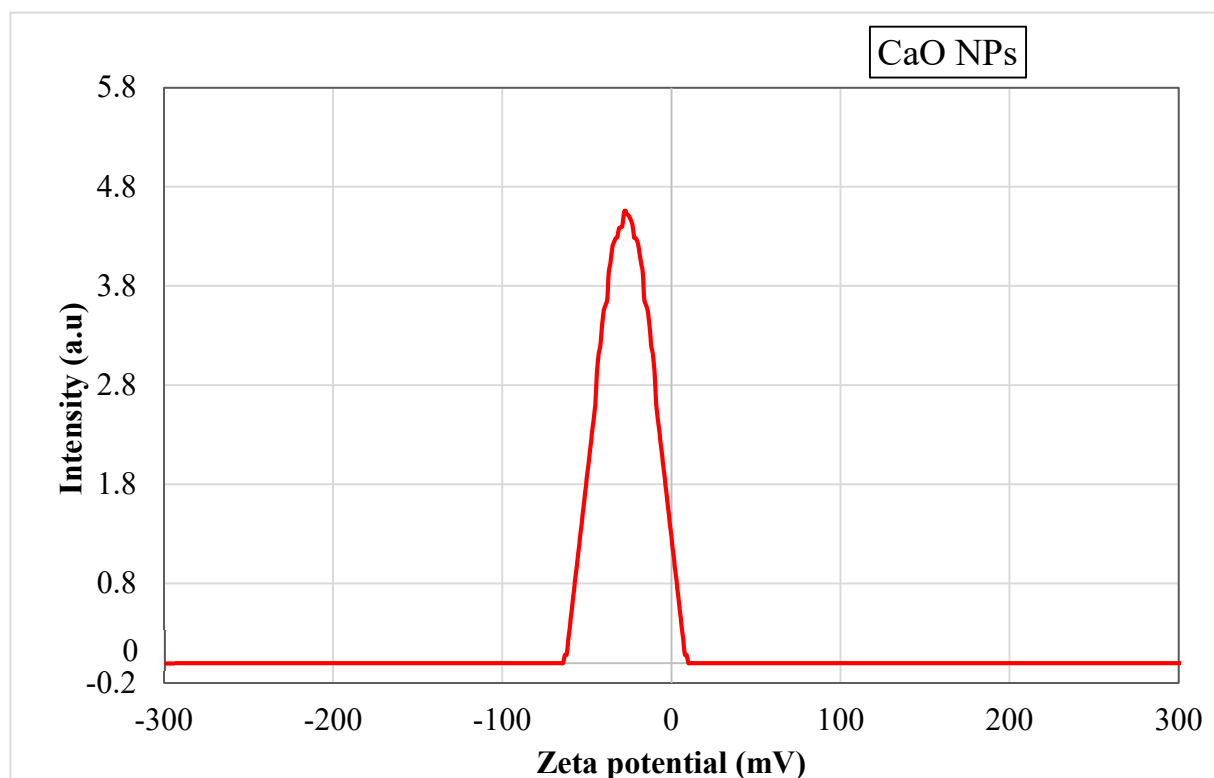

**Fig. S3A** Impact of NaCl stress, AMF and CaO NPs on superoxide content in leaves. Bars represent the mean values from nine biological replicates ( $n = 9$ ). Error bars indicate the standard error. Different lowercase letters above error bars denote statistically significant differences among treatments according to Tukey's HSD post hoc test following one-way ANOVA ( $P < 0.05$ ), where treatments sharing the same letter are not significantly different. Treatment abbreviations: C, control; CM, control + AMF; CN, control + CaO NPs; CMN, control + AMF + CaO NPs; S, NaCl stress; SM, NaCl + AMF; SN, NaCl + CaO NPs; SMN, NaCl + AMF + CaO NPs.

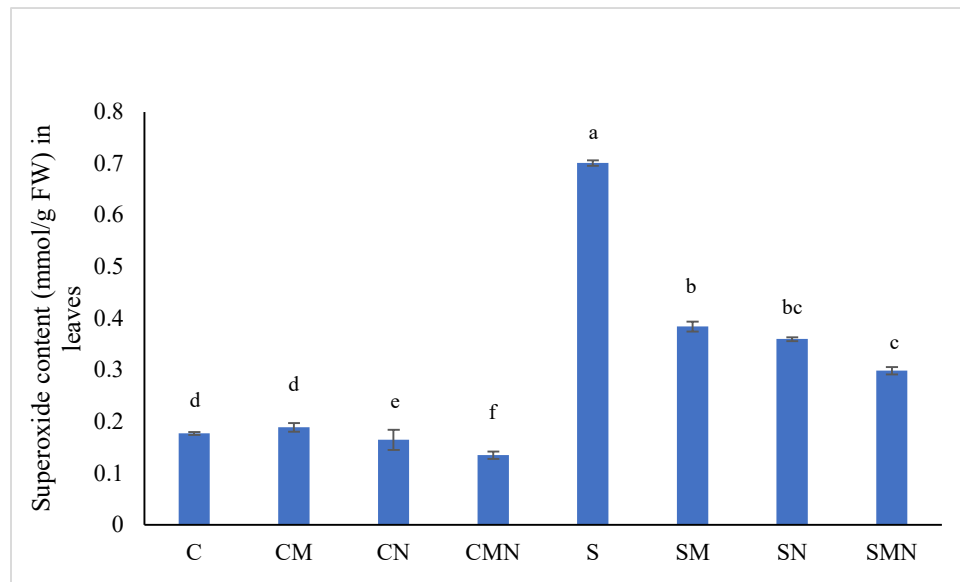



**Fig. S3B** Impact of NaCl stress, AMF and CaO NPs on superoxide content in roots. Bars represent the mean values from nine biological replicates ( $n = 9$ ). Error bars indicate the standard error. Different lowercase letters above error bars denote statistically significant differences among treatments according to Tukey's HSD post hoc test following one-way ANOVA ( $P < 0.05$ ), where treatments sharing the same letter are not significantly different. Treatment abbreviations: C, control; CM, control + AMF; CN, control + CaO NPs; CMN, control + AMF + CaO NPs; S, NaCl stress; SM, NaCl + AMF; SN, NaCl + CaO NPs; SMN, NaCl + AMF + CaO NPs.

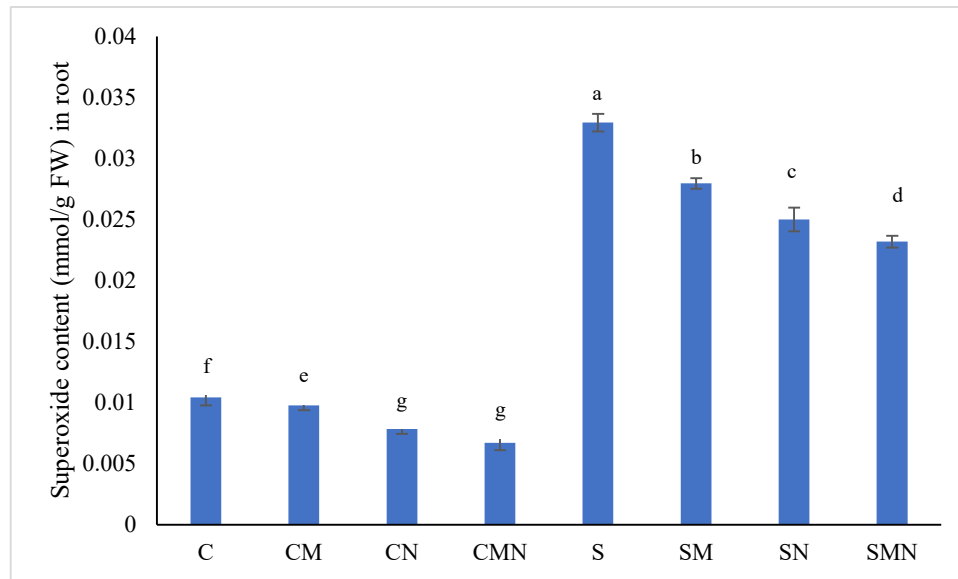

**Fig. S4A** Impact of NaCl stress, AMF and CaO NPs on H<sub>2</sub>O<sub>2</sub> content in leaves. Bars represent the mean values from nine biological replicates (n = 9). Error bars indicate the standard error. Different lowercase letters above error bars denote statistically significant differences among treatments according to Tukey's HSD post hoc test following one-way ANOVA (P < 0.05), where treatments sharing the same letter are not significantly different. Treatment abbreviations: C, control; CM, control + AMF; CN, control + CaO NPs; CMN, control + AMF + CaO NPs; S, NaCl stress; SM, NaCl + AMF; SN, NaCl + CaO NPs; SMN, NaCl + AMF + CaO NPs.

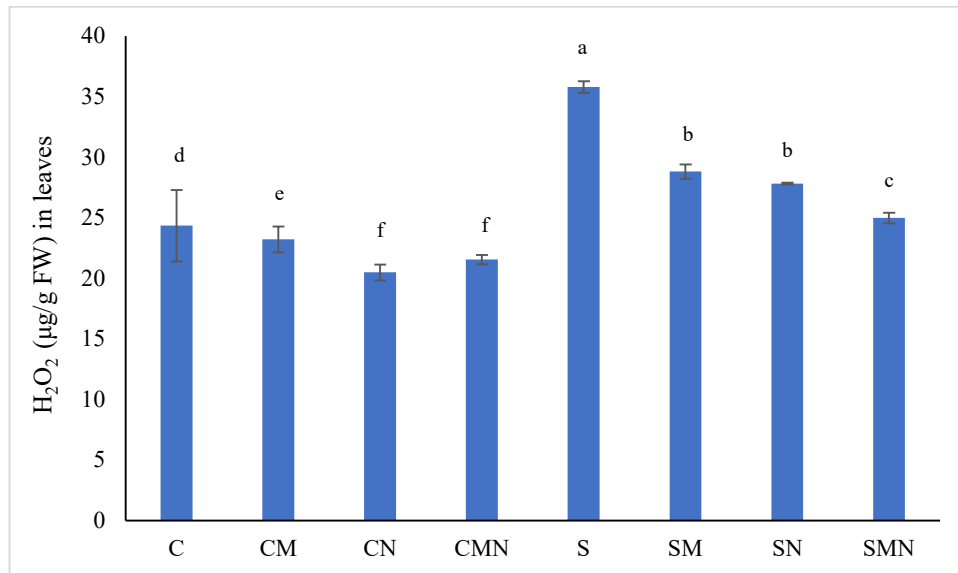

**Fig. S4B** Impact of NaCl stress, AMF and CaO NPs on H<sub>2</sub>O<sub>2</sub> content in roots. Bars represent the mean values from nine biological replicates (n = 9). Error bars indicate the standard error. Different lowercase letters above error bars denote statistically significant differences among treatments according to Tukey's HSD post hoc test following one-way ANOVA (P < 0.05), where treatments sharing the same letter are not significantly different. Treatment abbreviations: C, control; CM, control + AMF; CN, control + CaO NPs; CMN, control + AMF + CaO NPs; S, NaCl stress; SM, NaCl + AMF; SN, NaCl + CaO NPs; SMN, NaCl + AMF + CaO NPs.

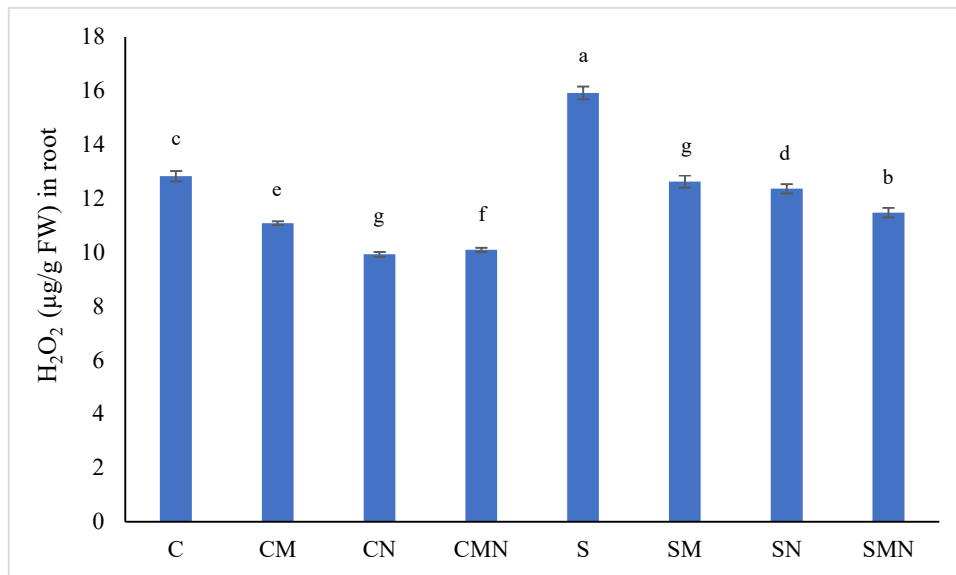

**Fig. S5A** Impact of NaCl stress, AMF and CaO NPs on MDA content in leaves. Boxplots represent MDA concentration (in  $\mu\text{mol/g FW}$ ) across nine biological replicates ( $n = 9$ ) for each treatment. Different lowercase letters above the boxes denote statistically significant differences among treatments according to Tukey's HSD post hoc test following one-way ANOVA ( $P < 0.05$ ); treatments sharing the same letter are not significantly different. Treatment abbreviations: C, control; CM, control + AMF; CN, control + CaO NPs; CMN, control + AMF + CaO NPs; S, NaCl stress; SM, NaCl + AMF; SN, NaCl + CaO NPs; SMN, NaCl + AMF + CaO NPs.

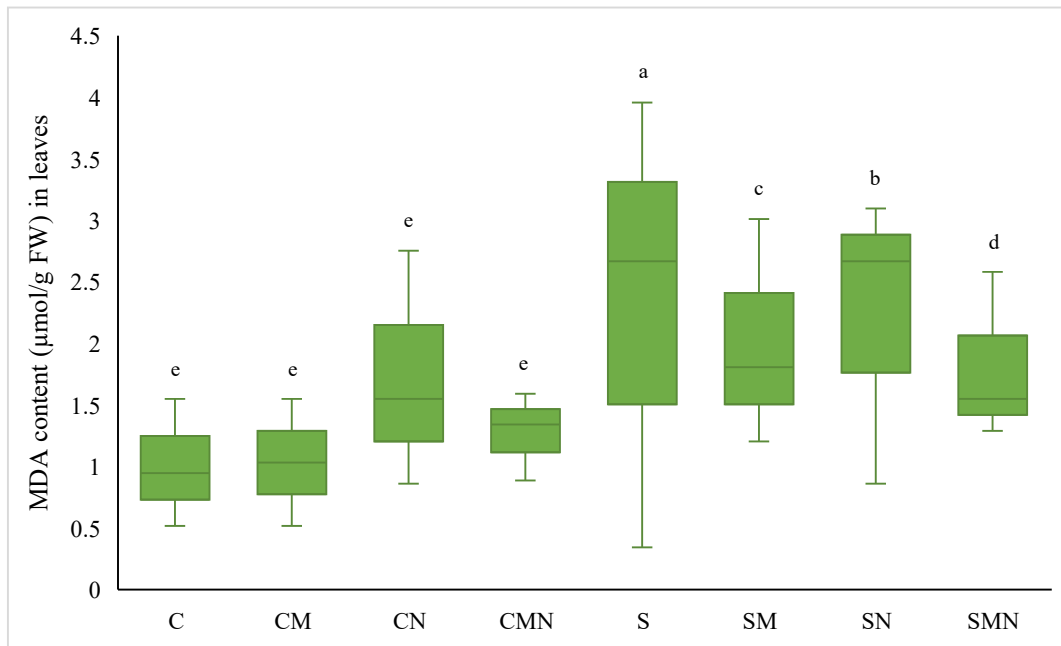

**Fig. S5B** Impact of NaCl stress, AMF and CaO NPs on MDA content in root. Boxplots represent MDA concentration (in  $\mu\text{mol/g FW}$ ) across nine biological replicates ( $n = 9$ ) for each treatment. Different lowercase letters above the boxes denote statistically significant differences among treatments according to Tukey's HSD post hoc test following one-way ANOVA ( $P < 0.05$ ); treatments sharing the same letter are not significantly different. Treatment abbreviations: C, control; CM, control + AMF; CN, control + CaO NPs; CMN, control + AMF + CaO NPs; S, NaCl stress; SM, NaCl + AMF; SN, NaCl + CaO NPs; SMN, NaCl + AMF + CaO NPs.

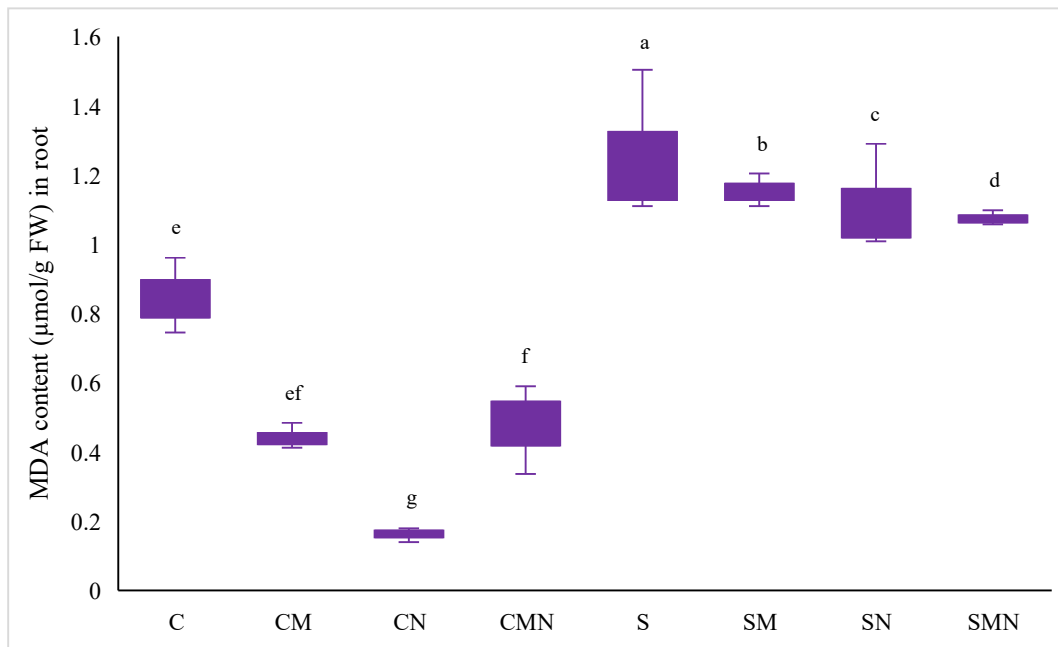

**Fig. S6** Principal Component Analysis (PCA) biplot depicting the relationships among measured physiological and biochemical parameters in rice plants subjected to various treatments. The biplot illustrates the treatments: C, control; CM, control + AMF; CN, control + CaO NPs; CMN, control + AMF + CaO NPs; S, NaCl stress; SM, NaCl + AMF; SN, NaCl + CaO NPs; SMN, NaCl + AMF + CaO NPs. Vectors represent the contribution and direction of various parameters, with Dim1 and Dim2 accounting for 86.2% and 6.7% of the total variance, respectively.

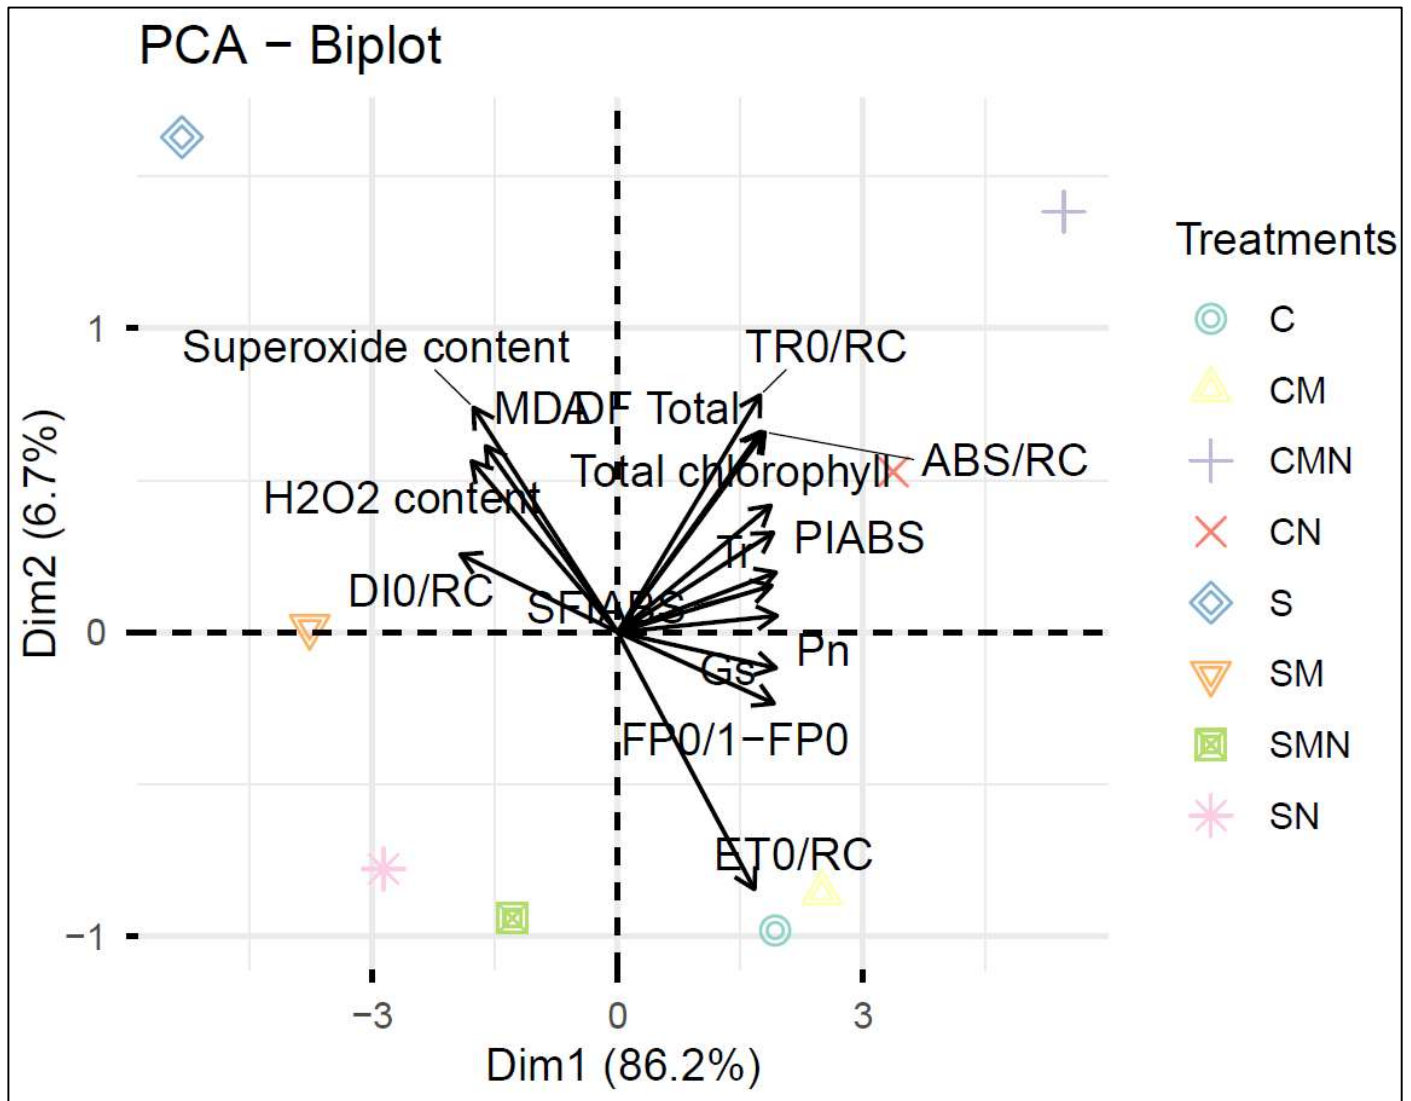

Supplement: d5en00583c1.pdf [file d5en00583c1.pdf]
